# Supplementary material for: Modulation of pulmonary desmosomes by inhaler therapy in preterm-born children with bronchopulmonary dysplasia
Source: Springer Nature journal article supplement (doi:10.1038/s41598-023-34233-5), 2023-05-05
Supplement: MOESM1 [file 41598_2023_34233_MOESM1_ESM.pdf]

## **Modulation of Pulmonary Desmosomes by Inhaler Therapy in Preterm-born Children with Bronchopulmonary Dysplasia – Online Supplement**

Christopher W Course<sup>1</sup>, Philip A Lewis<sup>2</sup>, Sarah J Kotecha <sup>1</sup>, Michael Cousins<sup>1,3</sup>, Kylie Hart<sup>3</sup>, W John Watkins<sup>1</sup>, Kate J Heesom<sup>4</sup>, Sailesh Kotecha<sup>1\*</sup>.

<sup>1</sup>Department of Child Health, School of Medicine, Cardiff University, Cardiff, United Kingdom.

<sup>2</sup>School of Cellular and Molecular Medicine, Faculty of Life Sciences, University of Bristol, Bristol, United Kingdom

<sup>3</sup>Department of Paediatrics, Cardiff and Vale University Health Board, Cardiff, United Kingdom

<sup>4</sup>Proteomics Facility, Faculty of Life Sciences, University of Bristol, Bristol, United Kingdom

**\*Corresponding Author:** Professor Sailesh Kotecha  
Department of Child Health  
Cardiff University School of Medicine  
Cardiff CF14 4XN  
United Kingdom  
[kotechas@cardiff.ac.uk](mailto:kotechas@cardiff.ac.uk)

## Supplementary Methods:

### *RCT Trial:*

Children received either monotherapy with inhaled corticosteroids (ICS) (50µg fluticasone propionate, two actuations taken twice a day), combination therapy of ICS and long-acting beta-agonists (LABA) (50µg fluticasone propionate and 25µg salmeterol xinafoate, two actuations taken twice a day) or placebo for twelve weeks. All trial medications were administered via a spacer device (Volumatic®, Allen & Hanburys, UK) Active trial medications were produced by St Mary's Pharmaceutical Unit, Cardiff, UK. Placebo inhalers were sourced from GlaxoSmithKline (GSK). All inhaler canisters were placed in identical plain-coloured actuators sourced from GSK to ensure adequate blinding to trial group. Participants who had previously been receiving inhaled steroid treatment prior to enrolment were weaned off steroid inhalers over a four-week washout period prior to starting the trial. All trial participants received training on good inhaler technique by the research team. To avoid ethical conflict, children receiving ICS prior to starting the trial were not randomised to the placebo arm.

### *Sample analysis*

#### *TMT Labelling*

EBC samples were analysed at the University of Bristol Proteomics Facility. 100µL of each sample (ensuring that no sample contained more than 50µg of protein) was digested with trypsin (1.25µg trypsin; 37°C, overnight), labelled with Tandem Mass Tag (TMT) eleven plex reagents according to the manufacturer's protocol (Thermo Fisher Scientific, Loughborough, UK) and the labelled samples pooled. The pooled sample was desalted using a SepPak

cartridge according to the manufacturer's instructions (Waters, Milford, Massachusetts, USA). Eluate from the SepPak cartridge was evaporated to dryness and resuspended in 1% formic acid prior to analysis by nano-LC MSMS using an Orbitrap Fusion Lumos mass spectrometer (Thermo Scientific).

### *Nano-LC Mass Spectrometry*

The TMT-labelled pool was fractionated using an Ultimate 3000 nano-LC system in line with an Orbitrap Fusion Lumos mass spectrometer (Thermo Scientific). In brief, peptides in 1% (vol/vol) formic acid were injected onto an Acclaim PepMap C18 nano-trap column (Thermo Scientific). After washing with 0.5% (vol/vol) acetonitrile 0.1% (vol/vol) formic acid peptides were resolved on a 250 mm × 75 µm Acclaim PepMap C18 reverse phase analytical column (Thermo Scientific) over a 150 min organic gradient, using 7 gradient segments (1-6% solvent B over 1min., 6-15% B over 58min., 15-32% B over 58min., 32-40% B over 5min., 40-90% B over 1min., held at 90% B for 6min and then reduced to 1% B over 1min.) with a flow rate of 300 nl min<sup>-1</sup>. Solvent A was 0.1% formic acid and Solvent B was aqueous 80% acetonitrile in 0.1% formic acid. Peptides were ionized by nano-electrospray ionization at 2.0kV using a stainless-steel emitter with an internal diameter of 30 µm (Thermo Scientific) and a capillary temperature of 300°C.

All spectra were acquired using an Orbitrap Fusion Lumos mass spectrometer controlled by Xcalibur 3.0 software (Thermo Scientific) and operated in data-dependent acquisition mode using an SPS-MS3 workflow. FTMS1 spectra were collected at a resolution of 120 000, with an automatic gain control (AGC) target of 200,000 and a max injection time of 50ms. Precursors were filtered with an intensity threshold of 5000, according to charge state (to

include charge states 2-7) and with monoisotopic peak determination set to Peptide. Previously interrogated precursors were excluded using a dynamic window (60s +/-10ppm). The MS2 precursors were isolated with a quadrupole isolation window of 0.7m/z. ITMS2 spectra were collected with an AGC target of 10 000, max injection time of 70ms and CID collision energy of 35%.

For FTMS3 analysis, the Orbitrap was operated at 50,000 resolution with an AGC target of 50,000 and a max injection time of 105ms. Precursors were fragmented by high energy collision dissociation (HCD) at a normalised collision energy of 60% to ensure maximal TMT reporter ion yield. Synchronous Precursor Selection (SPS) was enabled to include up to 5 MS2 fragment ions in the FTMS3 scan.

#### *Data Analysis*

The raw data files were processed and quantified using Proteome Discoverer software v2.1 (Thermo Scientific) and searched against the UniProt Human database (downloaded October 2019: 150786 entries) using the SEQUEST HT algorithm. Peptide precursor mass tolerance was set at 10ppm, and MS/MS tolerance was set at 0.6Da. Search criteria included oxidation of methionine (+15.995Da), acetylation of the protein N-terminus (+42.011Da) and Methionine loss plus acetylation of the protein N-terminus (-89.03Da) as variable modifications and carbamidomethylation of cysteine (+57.021Da) and the addition of the TMT mass tag (+229.163Da) to peptide N-termini and lysine as fixed modifications. Searches were performed with full tryptic digestion and a maximum of 2 missed cleavages were allowed. The reverse database search option was enabled, and all data was filtered to satisfy false discovery rate (FDR) of 5%.

Supplementary Table 1: List of all proteins detected within the sample, in decreasing order of number of samples in which it was detected.

| UniProt Accession Number | Gene Name | Protein Name                              | Number of Samples | Accession Number | Gene Name | Protein Name                                  | Number of Samples |
|--------------------------|-----------|-------------------------------------------|-------------------|------------------|-----------|-----------------------------------------------|-------------------|
| H6VRG2                   | KRT1      | Cytokeratin-1                             | 218               | P04040           | CAT       | Catalase                                      | 191               |
| H6VRG3                   | KRT1      | Cytokeratin-1                             | 218               | Q01469           | FABP5     | Fatty acid-binding protein 5                  | 190               |
| P01040                   | CSTA      | Cystatin-A                                | 218               | P02768           | ALB       | Albumin                                       | 187               |
| P02533                   | KRT14     | Keratin, type I cytoskeletal 14           | 218               | P04406           | GAPDH     | Glyceraldehyde-3-phosphate dehydrogenase      | 186               |
| P02538                   | KRT6A     | Keratin, type II cytoskeletal 6A          | 218               | Q15517           | CDSN      | Corneodesmosin                                | 185               |
| P08779                   | KRT16     | Keratin, type I cytoskeletal 16           | 218               | Q9NZT1           | CALML5    | Calmodulin-like protein 5                     | 184               |
| P13645                   | KRT10     | Keratin, type I cytoskeletal 10           | 218               | P62736           | ACTA2     | Actin, aortic smooth muscle                   | 165               |
| P13647                   | KRT5      | Keratin, type II cytoskeletal 5           | 218               | Q7Z794           | KRT77     | Keratin, type II cytoskeletal 1b              | 165               |
| P14923                   | JUP       | Junction plakoglobin                      | 218               | P31151           | S100A7    | Protein S100-A7                               | 164               |
| P15924                   | DSP       | Desmoplakin                               | 218               | P10599           | TXN       | Thioredoxin                                   | 156               |
| P25311                   | AZGP1     | Zinc-alpha-2-glycoprotein                 | 218               | P31025           | LCN1      | Lipocalin-1                                   | 154               |
| P31944                   | CASP14    | Caspase-14                                | 218               | Q13835           | PKP1      | Plakophilin-1                                 | 154               |
| P35527                   | KRT9      | Keratin, type I cytoskeletal 9            | 218               | Q6UWP8           | SBSN      | Suprabasin                                    | 153               |
| P35908                   | KRT2      | Keratin, type II cytoskeletal 2 epidermal | 218               | P05089           | ARG1      | Arginase-1                                    | 152               |
| P62979                   | RPS27A    | Ubiquitin-40S ribosomal protein S27a      | 218               | P12273           | PIP       | Prolactin-inducible protein                   | 148               |
| Q02413                   | DSG1      | Desmoglein-1                              | 218               | Q06830           | PRDX1     | Peroxiredoxin-1                               | 144               |
| Q04695                   | KRT17     | Keratin, type I cytoskeletal 17           | 218               | P06702           | S100A9    | Protein S100-A9                               | 142               |
| Q08554                   | DSC1      | Desmocollin-1                             | 218               | P60709           | ACTB      | Actin, cytoplasmic 1                          | 137               |
| Q8N1N4                   | KRT78     | Keratin, type II cytoskeletal 78          | 218               | Q96QE3           | ATAD5     | ATPase family AAA domain-containing protein 5 | 128               |
| Q5D862                   | FLG2      | Filaggrin-2                               | 214               | P32119           | PRDX2     | Peroxiredoxin-2                               | 127               |
|                          |           |                                           |                   |                  |           |                                               |                   |
| P81605                   | DCD       | Dermcidin                                 | 210               | A1A4E9           | KRT13     | Keratin 13                                    | 123               |
| P07355                   | ANXA2     | Annexin A2                                | 198               | Q6KB66           | KRT80     | Keratin, type II cytoskeletal 80              | 122               |
| Q14CN4                   | KRT72     | Keratin, type II cytoskeletal 72          | 198               | P78386           | KRT85     | Keratin, type II cuticular Hb5                | 119               |
| O75223                   | GGCT      | Gamma-glutamylcyclotransferase            | 195               | P04792           | HSPB1     | Heat shock protein beta-1                     | 118               |
| P20930                   | FLG       | Filaggrin                                 | 194               | P47929           | LGALS7    | Galectin-7                                    | 116               |
| P04259                   | KRT6B     | Keratin, type II cytoskeletal 6B          | 193               | P05109           | S100A8    | Protein S100-A8                               | 111               |

|            |           |                                                                         |     |        |          |                                                             |    |
|------------|-----------|-------------------------------------------------------------------------|-----|--------|----------|-------------------------------------------------------------|----|
| P01834     | IGKC      | Immunoglobulin kappa constant                                           | 104 | Q5T749 | KPRP     | Keratinocyte proline-rich protein                           | 50 |
| Q08188     | TGM3      | Protein-glutamine gamma-glutamyltransferase E                           | 102 | Q5T749 | KPRP     | Keratinocyte proline-rich protein                           | 50 |
| Q13867     | BLMH      | Bleomycin hydrolase                                                     | 101 | Q9UI42 | CPA4     | Carboxypeptidase A4                                         | 48 |
| Q96P63     | SERPINB12 | Serpin B12                                                              | 99  | P22531 | SPRR2E   | Small proline-rich protein 2E                               | 43 |
| B4DKJ0     | Unknown   | cDNA FLJ58539, highly similar to Keratin, type II cytoskeletal 4        | 95  | Q16610 | ECM1     | Extracellular matrix protein 1                              | 40 |
| P69905     | HBA1      | Hemoglobin subunit alpha                                                | 93  | P06733 | ENO1     | Alpha-enolase                                               | 39 |
| Q86YZ3     | HRNR      | Hornerin                                                                | 92  | P08670 | VIM      | Vimentin                                                    | 39 |
| P0DUB6     | AMY1A     | Alpha-amylase 1A                                                        | 91  | Q9GZZ8 | LACRT    | Extracellular glycoprotein lacritin                         | 35 |
| P27482     | CALML3    | Calmodulin-like protein 3                                               | 88  | W8QEY1 | Unknown  | Lactotransferrin                                            | 35 |
| Q15323     | KRT31     | Keratin, type I cuticular Ha1                                           | 87  | Q9UGM3 | DMBT1    | Deleted in malignant brain tumors 1 protein                 | 34 |
| Q7Z3Y8     | KRT27     | Keratin, type I cytoskeletal 27                                         | 84  | Q9UJ41 | RABGEF1  | Rab5 GDP/GTP exchange factor                                | 34 |
| P61626     | LYZ       | Lysozyme C                                                              | 83  | O76011 | KRT34    | Keratin, type I cuticular Ha4                               | 33 |
| P02810     | PRH1      | Salivary acidic proline-rich phosphoprotein 1/2                         | 81  | Q9HCM4 | EPB41L5  | Band 4.1-like protein 5                                     | 33 |
| P04083     | ANXA1     | Annexin A1                                                              | 81  | P62805 | H4C1     | Histone H4                                                  | 32 |
| Q9NSB2     | KRT84     | Keratin, type II cuticular Hb4                                          | 81  | O76013 | KRT36    | Keratin, type I cuticular Ha6                               | 31 |
| P68871     | HBB       | Hemoglobin subunit beta                                                 | 72  | P01591 | JCHAIN   | Immunoglobulin J chain                                      | 30 |
| Q14525     | KRT33B    | Keratin, type I cuticular Ha3-II                                        | 72  | Q9C075 | KRT23    | Keratin, type I cytoskeletal 23                             | 30 |
| B2R853     | Unknown   | cDNA, FLJ93744, highly similar to Homo sapiens keratin 6E (KRT6E), mRNA | 70  | Q9Y224 | RTRAF    | RNA transcription, translation and transport factor protein | 30 |
| P01876     | IGHA1     | Immunoglobulin heavy constant alpha 1                                   | 66  | P62328 | TMSB4X   | Thymosin beta-4                                             | 29 |
| Q15828     | CST6      | Cystatin-M                                                              | 66  | P01857 | IGHG1    | Immunoglobulin heavy constant gamma 1                       | 28 |
| O60814     | H2BC12    | Histone H2B type 1-K                                                    | 65  | P14618 | PKM      | Pyruvate kinase PKM                                         | 28 |
| P00441     | SOD1      | Superoxide dismutase                                                    | 61  | Q8TF66 | LRR15    | Leucine-rich repeat-containing protein 15                   | 28 |
| P23490     | LORICRIN  | Loricrin                                                                | 61  | G3V1M9 | PRB1     | Basic salivary proline-rich protein 1                       | 27 |
| P29508     | SERPINB3  | Serpin B3                                                               | 58  | P12035 | KRT3     | Keratin, type II cytoskeletal 3                             | 27 |
| AOA0S2Z4G4 | TPM3      | Tropomyosin 3 isoform 1                                                 | 57  | P68431 | H3C1     | Histone H3.1                                                | 27 |
| Q96DR8     | MUCL1     | Mucin-like protein 1                                                    | 54  | Q9BYR6 | KRTAP3-3 | Keratin-associated protein 3-3                              | 25 |
| O43790     | KRT86     | Keratin, type II cuticular Hb6                                          | 53  | Q9HCY8 | S100A14  | Protein S100-A14                                            | 25 |

|        |           |                                                                  |    |        |        |                                                      |    |
|--------|-----------|------------------------------------------------------------------|----|--------|--------|------------------------------------------------------|----|
| P22735 | TGM1      | Protein-glutamine gamma-glutamyltransferase K                    | 24 | Q92820 | GGH    | Gamma-glutamyl hydrolase                             | 15 |
| P82279 | CRB1      | Protein crumbs homolog 1                                         | 24 | Q9UKX2 | MYH2   | Myosin-2                                             | 14 |
| Q05639 | EEF1A2    | Elongation factor 1-alpha 2                                      | 23 | P07339 | CTSD   | Cathepsin D                                          | 13 |
| P04080 | CSTB      | Cystatin-B                                                       | 20 | P78385 | KRT83  | Keratin, type II cuticular Hb3                       | 13 |
| P15090 | FABP4     | Fatty acid-binding protein, adipocyte                            | 20 | P31947 | SFN    | 14-3-3 protein sigma                                 | 12 |
| P63104 | YWHAZ     | 14-3-3 protein zeta/delta                                        | 20 | P60174 | TPI1   | Triosephosphate isomerase                            | 12 |
| Q52LG2 | KRTAP13-2 | Keratin-associated protein 13-2                                  | 20 | P42357 | HAL    | Histidine ammonia-lyase                              | 11 |
| Q5T750 | XP32      | Skin-specific protein 32                                         | 20 | P02814 | SMR3B  | Submaxillary gland androgen-regulated protein 3B     | 10 |
| Q6ZVX7 | NCCRP1    | F-box only protein 50                                            | 20 | P0DPA2 | VSIG8  | V-set and immunoglobulin domain-containing protein 8 | 10 |
| P35579 | MYH9      | Myosin-9                                                         | 19 | P16615 | ATP2A2 | Sarcoplasmic/endoplasmic reticulum calcium ATPase 2  | 10 |
| Q6E0U4 | DMKN      | Dermokine                                                        | 19 | Q6A163 | KRT39  | Keratin, type I cytoskeletal 39                      | 10 |
| Q8IUC0 | KRTAP13-1 | Keratin-associated protein 13-1                                  | 19 | Q96DA0 | ZG16B  | Zymogen granule protein 16 homolog B                 | 10 |
| B4DJM5 | Unknown   | cDNA FLJ61294, highly similar to Keratin, type I cytoskeletal 17 | 18 | Q9NQ38 | SPINK5 | Serine protease inhibitor Kazal-type 5               | 10 |
| P01036 | CST4      | Cystatin-S                                                       | 18 | Q9UKK9 | NUDT5  | ADP-sugar pyrophosphatase                            | 10 |
| P02452 | COL1A1    | Collagen alpha-1(I) chain                                        | 18 | A2IDD5 | CCDC78 | Coiled-coil domain-containing protein 78             | 9  |
| P03973 | SLPI      | Secretory leukocyte peptidase inhibitor                          | 18 | P02812 | PRB2   | Basic salivary proline-rich protein 2                | 9  |
| Q14533 | KRT81     | Keratin, type II cuticular Hb1                                   | 18 | P06454 | PTMA   | Prothymosin alpha                                    | 9  |
| Q3LI77 | KRTAP13-4 | Keratin-associated protein 13-4                                  | 18 | P16104 | H2AX   | Histone H2AX                                         | 9  |
| Q96QA5 | GSDMA     | Gasdermin-A                                                      | 18 | Q02383 | SEMG2  | Semenogelin-2                                        | 9  |
| P13929 | ENO3      | Beta-enolase                                                     | 17 | Q3SY84 | KRT71  | Keratin, type II cytoskeletal 71                     | 9  |
| Q14574 | DSC3      | Desmocollin-3                                                    | 17 | Q6S8J3 | POTEE  | POTE ankyrin domain family member E                  | 9  |
| Q2PPJ7 | RALGAPA2  | RalGTPase-activating protein subunit alpha-2                     | 17 | Q6YFL4 | KRTHB6 | Type II keratin (Fragment)                           | 9  |
| Q6ZUA9 | MROH5     | Maestro heat-like repeat family member 5                         | 17 | Q92764 | KRT35  | Keratin, type I cuticular Ha5                        | 9  |
| P17066 | HSPA6     | Heat shock 70 kDa protein 6                                      | 15 | Q9BZE2 | PUS3   | tRNA pseudouridine(38/39) synthase                   | 9  |
| P22528 | SPRR1B    | Cornifin-B                                                       | 15 | Q9HC84 | MUC5B  | Mucin-5B (MUC-5B)                                    | 9  |
| Q14508 | WFDC2     | WAP four-disulfide core domain protein 2                         | 15 | P04279 | SEMG1  | Semenogelin-1                                        | 8  |

|        |         |                                                 |   |            |          |                                                  |   |
|--------|---------|-------------------------------------------------|---|------------|----------|--------------------------------------------------|---|
| P05976 | MYL1    | Myosin light chain 1/3, skeletal muscle isoform | 8 | Q9BYR9     | KRTAP2-4 | Keratin-associated protein 2-4                   | 7 |
| P09228 | CST2    | Cystatin-SA                                     | 8 | O43829     | ZBTB14   | Zinc finger and BTB domain-containing protein 14 | 6 |
| P11055 | MYH3    | Myosin-3                                        | 8 | Q5XKE5     | KRT79    | Keratin, type II cytoskeletal 79                 | 6 |
| P31949 | S100A11 | Protein S100-A11                                | 8 | Q9Y618     | NCOR2    | Nuclear receptor corepressor 2                   | 6 |
| P49454 | CENPF   | Centromere protein F                            | 8 | P13639     | EEF2     | Elongation factor 2                              | 5 |
| P52566 | ARHGDIB | Rho GDP-dissociation inhibitor 2                | 8 | P62937     | PPIA     | Peptidyl-prolyl cis-trans isomerase A            | 5 |
| P00491 | PNP     | Purine nucleoside phosphorylase                 | 7 | A0A1B0GVI3 | KRT10    | Keratin, type I cytoskeletal 10 (Fragment)       | 4 |
| P09211 | GSTP1   | Glutathione S-transferase P                     | 7 | D3DTX7     | COL1A1   | Collagen, type I, alpha 1, isoform CRA_a         | 4 |
| P11021 | HSPA5   | Endoplasmic reticulum chaperone BiP             | 7 | O95678     | KRT75    | Keratin, type II cytoskeletal 75                 | 4 |
| P47756 | CAPZB   | F-actin-capping protein subunit beta            | 7 | P05455     | SSB      | Lupus La protein                                 | 4 |
| P60900 | PSMA6   | Proteasome subunit alpha type-6                 | 7 | Q9BYR8     | KRTAP3-1 | Keratin-associated protein 3-1                   | 4 |
| Q8NEZ4 | KMT2C   | Histone-lysine N-methyltransferase 2C           | 7 | Q9H1E1     | RNASE7   | Ribonuclease 7                                   | 4 |
| Q8WVV4 | POF1B   | Protein POF1B                                   | 7 | Q15149     | PLEC     | Plectin                                          | 2 |



Supplementary Table 2: Detected proteins with a significant abundance difference between groups.

| UniProt Accession Number | Gene Name | Protein Name                                  | Protein Function                                 | Preterm vs Term<br>n = 149 v 69 |                     |             |               | BPD vs No BPD<br>n = 37 v 112 |                     |             |               | PT <sub>low</sub> vs PT <sub>c</sub><br>n = 53 v 97 |                     |             |              |
|--------------------------|-----------|-----------------------------------------------|--------------------------------------------------|---------------------------------|---------------------|-------------|---------------|-------------------------------|---------------------|-------------|---------------|-----------------------------------------------------|---------------------|-------------|--------------|
|                          |           |                                               |                                                  | n                               | Log <sub>2</sub> FC | Ratio       | p             | n                             | Log <sub>2</sub> FC | Ratio       | p             | n                                                   | Log <sub>2</sub> FC | Ratio       | p            |
| P81605                   | DCD       | Dermcidin                                     | Peptidase<br>Antimicrobial activity              | 146 v 64                        | -0.03               | 0.98        | 0.83          | <b>37 v 109</b>               | <b>-0.42</b>        | <b>0.75</b> | <b>0.03*</b>  | 52 v 94                                             | 0.23                | 1.17        | 0.16         |
| P04259                   | KRT6B     | Keratin, type II cytoskeletal 6B              | Cytoskeleton                                     | <b>133 v 60</b>                 | <b>0.54</b>         | <b>1.45</b> | <b>0.03*</b>  | <b>33 v 100</b>               | <b>0.76</b>         | <b>1.69</b> | <b>0.03*</b>  | 46 v 87                                             | 0.34                | 1.27        | 0.25         |
| Q01469                   | FABP5     | Fatty acid-binding protein 5                  | Lipid transporter                                | 122 v 68                        | -0.19               | 0.88        | 0.27          | 27 v 95                       | 0.06                | 1.04        | 0.77          | <b>38 v 84</b>                                      | <b>-0.39</b>        | <b>0.76</b> | <b>0.04*</b> |
| P62736                   | ACTA2     | Actin, aortic smooth muscle                   | Muscle protein                                   | <b>115 v 50</b>                 | <b>0.54</b>         | <b>1.45</b> | <b>0.01*</b>  | 31 v 84                       | -0.43               | 0.74        | 0.10          | 46 v 69                                             | -0.07               | 0.95        | 0.77         |
| P05089                   | ARG1      | Arginase-1                                    | Hydrolase<br>Antimicrobial activity              | 104 v 48                        | -0.03               | 0.98        | 0.86          | 29 v 75                       | -0.25               | 0.84        | 0.17          | <b>37 v 67</b>                                      | <b>-0.39</b>        | <b>0.76</b> | <b>0.03*</b> |
| Q6UWP8                   | SBSN      | Suprabasin                                    | Unknown                                          | <b>99 v 54</b>                  | <b>-0.33</b>        | <b>0.80</b> | <b>0.02*</b>  | <b>25 v 74</b>                | <b>-0.34</b>        | <b>0.79</b> | <b>0.049*</b> | 36 v 63                                             | -0.12               | 0.92        | 0.43         |
| Q6KB66                   | KRT80     | Keratin, type II cytoskeletal 80              | Cytoskeleton                                     | <b>72 v 50</b>                  | <b>-0.27</b>        | <b>0.83</b> | <b>0.01*</b>  | 18 v 54                       | 0.09                | 1.06        | 0.52          | 24 v 48                                             | 0.02                | 1.01        | 0.89         |
| P04083                   | ANXA1     | Annexin A1                                    | Protease inhibitor<br>Anti-inflammatory activity | 50 v 31                         | -0.09               | 0.94        | 0.75          | 14 v 36                       | 0.19                | 1.14        | 0.57          | <b>15 v 35</b>                                      | <b>-0.77</b>        | <b>0.59</b> | <b>0.02*</b> |
| P23490                   | LORICRIN  | Loricrin                                      | Cytoskeleton                                     | <b>42 v 19</b>                  | <b>-0.42</b>        | <b>0.75</b> | <b>0.03*</b>  | 10 v 32                       | -0.08               | 0.95        | 0.67          | 14 v 28                                             | -0.23               | 0.85        | 0.20         |
| P29508                   | SERPINB3  | Serpin B3                                     | Protease inhibitor                               | 37 v 21                         | 0.59                | 1.51        | 0.19          | 12 v 25                       | 0.23                | 1.17        | 0.62          | <b>12 v 25</b>                                      | <b>-0.86</b>        | <b>0.55</b> | <b>0.01*</b> |
| P22531                   | SPRR2E    | Small proline-rich protein 2E                 | Peptide cross-linking                            | 36 v 7                          | 0.07                | 1.05        | 0.88          | <b>12 v 24</b>                | <b>-0.92</b>        | <b>0.53</b> | <b>0.04*</b>  | 16 v 20                                             | -0.40               | 0.76        | 0.33         |
| P06733                   | ENO1      | Alpha-enolase                                 | Transcription regulation                         | <b>29 v 10</b>                  | <b>-0.64</b>        | <b>0.64</b> | <b>0.01*</b>  | 6 v 23                        | 0.52                | 1.43        | 0.19          | 7 v 22                                              | 0.36                | 1.28        | 0.36         |
| Q9HCM4                   | EPB41L5   | Band 4.1-like protein 5                       | Cytoskeleton                                     | 22 v 11                         | -0.38               | 0.77        | 0.35          | <b>4 v 18</b>                 | <b>0.68</b>         | <b>1.60</b> | <b>0.04*</b>  | 7 v 15                                              | 0.61                | 1.53        | 0.21         |
| Q9C075                   | KRT23     | Keratin, type I cytoskeletal 23               | Cytoskeleton                                     | <b>22 v 8</b>                   | <b>-1.19</b>        | <b>0.44</b> | <b>0.01*</b>  | 6 v 16                        | -0.05               | 0.97        | 0.91          | 7 v 15                                              | 0.51                | 1.42        | 0.35         |
| P22735                   | TGM1      | Protein-glutamine gamma-glutamyltransferase K | Acyltransferase<br>Peptide cross-linking         | <b>15 v 9</b>                   | <b>-0.62</b>        | <b>0.65</b> | <b>0.047*</b> | 4 v 11                        | -0.56               | 0.68        | 0.36          | 5 v 10                                              | 0.32                | 1.25        | 0.55         |

|        |       |                                             |                                              |               |              |             |               |               |              |             |               |              |              |             |              |
|--------|-------|---------------------------------------------|----------------------------------------------|---------------|--------------|-------------|---------------|---------------|--------------|-------------|---------------|--------------|--------------|-------------|--------------|
| P63104 | YWHAZ | 14-3-3 protein zeta/delta                   | Signalling regulator                         | <b>11 v 9</b> | <b>-0.70</b> | <b>0.62</b> | <b>0.04*</b>  | 3 v 8         | 0.05         | 1.04        | 0.88          | 2 v 9        | -0.87        | 0.55        | 0.47         |
| P01036 | CST4  | Cystatin-S                                  | Protease inhibitor                           | 13 v 5        | -0.23        | 0.85        | 0.79          | <b>5 v 8</b>  | <b>-1.23</b> | <b>0.43</b> | <b>0.004*</b> | 6 v 7        | -0.29        | 0.82        | 0.58         |
| P03973 | SLPI  | Secretory leukocyte antipeptidase inhibitor | Protease inhibitor<br>Antimicrobial activity | 11 v 7        | 0.99         | 1.99        | 0.18          | <b>2 v 9</b>  | <b>-2.08</b> | <b>0.24</b> | <b>0.04*</b>  | <b>2 v 9</b> | <b>-2.32</b> | <b>0.20</b> | <b>0.03*</b> |
| Q96QA5 | GSDMA | Gasdermin-A                                 | Pore-forming protein                         | <b>11 v 7</b> | <b>1.03</b>  | <b>2.04</b> | <b>0.02*</b>  | 4 v 7         | -0.06        | 0.96        | 0.93          | 6 v 5        | -0.92        | 0.53        | 0.13         |
| Q6ZUA9 | MROH5 | Maestro heat-like repeat family member 5    | Unknown                                      | 6 v 11        | 0.01         | 1.01        | 0.99          | 2 v 4         | 0.18         | 1.13        | 0.82          | <b>3 v 3</b> | <b>-1.48</b> | <b>0.36</b> | <b>0.01*</b> |
| Q92820 | GGH   | Gamma-glutamyl hydrolase                    | Peptidase                                    | 12 v 3        | -0.66        | 0.63        | 0.30          | <b>2 v 10</b> | <b>-0.79</b> | <b>0.58</b> | <b>0.03*</b>  | 2 v 10       | 0.08         | 1.06        | 0.81         |
| Q9BZE2 | PUS3  | tRNA pseudouridine(38/39) synthase          | Isomerase                                    | <b>7 v 2</b>  | <b>-1.66</b> | <b>0.32</b> | <b>0.004*</b> | <b>2 v 5</b>  | <b>1.66</b>  | <b>3.16</b> | <b>0.004*</b> | 2 v 5        | 0.03         | 1.02        | 0.98         |
| P60900 | PSMA6 | Proteasome subunit alpha type-6             | Peptidase                                    | 7 v 0         | NA           | NA          | NA            | 2 v 5         | -0.35        | 0.78        | 0.37          | <b>2 v 5</b> | <b>1.05</b>  | <b>2.07</b> | <b>0.02*</b> |

BPD: Preterm-born with history of bronchopulmonary dysplasia; PT<sub>c</sub>: Preterm-born control; PT<sub>low</sub>: Preterm born with low lung function; Log<sub>2</sub>FC: Log<sub>2</sub> fold-change between groupings

\*Denotes p-value <0.05 from Welch's t-test

Supplementary Table 3: Treatment effect on proteins detected in every sample.

| UniProt Accession Number | Gene Name | Protein Name                              | Protein Function                         | Placebo n=12<br>Pre vs Post |       |      | ICS n=17<br>Pre vs Post |             |              | ICS/LABA n=17<br>Pre vs Post |             |               |
|--------------------------|-----------|-------------------------------------------|------------------------------------------|-----------------------------|-------|------|-------------------------|-------------|--------------|------------------------------|-------------|---------------|
|                          |           |                                           |                                          | Log <sub>2</sub> FC         | Ratio | p    | Log <sub>2</sub> FC     | Ratio       | p            | Log <sub>2</sub> FC          | Ratio       | p             |
| Q08554                   | DSC1      | Desmocollin-1                             | Cell-cell junction                       | 0.24                        | 1.18  | 0.12 | 0.04                    | 1.03        | 0.83         | <b>-0.47</b>                 | <b>0.72</b> | <b>0.048*</b> |
| Q02413                   | DSG1      | Desmoglein-1                              | Cell-cell junction                       | -0.20                       | 0.87  | 0.34 | -0.47                   | 0.72        | 0.08         | <b>-0.58</b>                 | <b>0.67</b> | <b>0.003*</b> |
| P15924                   | DSP       | Desmoplakin                               | Cell-cell junction, Cytoskeleton         | 0.07                        | 1.05  | 0.77 | -0.18                   | 0.88        | 0.19         | -0.21                        | 0.86        | 0.26          |
| P14923                   | JUP       | Junction plakoglobin                      | Plasma membrane protein complex          | -0.12                       | 0.92  | 0.59 | -0.41                   | 0.75        | 0.10         | <b>-0.52</b>                 | <b>0.70</b> | <b>0.002*</b> |
| H6VRG2                   | KRT1      | Cytokeratin-1                             | Cytoskeleton                             | -0.18                       | 0.88  | 0.28 | <b>-0.34</b>            | <b>0.79</b> | <b>0.03*</b> | -0.17                        | 0.89        | 0.32          |
| H6VRG3                   | KRT1      | Cytokeratin-1                             | Cytoskeleton                             | -0.34                       | 0.79  | 0.27 | -0.58                   | 1.49        | 0.11         | -0.33                        | 0.80        | 0.19          |
| P35908                   | KRT2      | Keratin, type II cytoskeletal 2 epidermal | Cytoskeleton                             | 0.10                        | 1.07  | 0.68 | -0.16                   | 0.90        | 0.55         | <b>-0.32</b>                 | <b>0.80</b> | <b>0.047*</b> |
| P13647                   | KRT5      | Keratin, type II cytoskeletal 5           | Cytoskeleton                             | -0.03                       | 0.98  | 0.89 | 0.02                    | 1.01        | 0.92         | 0.02                         | 1.01        | 0.88          |
| P02538                   | KRT6A     | Keratin, type II cytoskeletal 6A          | Cytoskeleton                             | 0.19                        | 1.14  | 0.73 | 0.24                    | 1.18        | 0.59         | 0.60                         | 1.52        | 0.25          |
| P35527                   | KRT9      | Keratin, type I cytoskeletal 9            | Cytoskeleton                             | -0.28                       | 0.82  | 0.28 | -0.30                   | 0.81        | 0.09         | 0.11                         | 1.08        | 0.59          |
| P13645                   | KRT10     | Keratin, type I cytoskeletal 10           | Structural protein extracellular space   | 0.09                        | 1.06  | 0.64 | -0.14                   | 0.91        | 0.45         | <b>-0.27</b>                 | <b>0.83</b> | <b>0.04*</b>  |
| P02533                   | KRT14     | Keratin, type I cytoskeletal 14           | Cytoskeleton                             | 0.03                        | 1.02  | 0.82 | -0.22                   | 1.16        | 0.26         | 0.22                         | 1.16        | 0.18          |
| P08779                   | KRT16     | Keratin, type I cytoskeletal 16           | Cytoskeleton                             | -0.11                       | 0.93  | 0.83 | 0.07                    | 1.05        | 0.90         | 0.55                         | 1.46        | 0.28          |
| Q04695                   | KRT17     | Keratin, type I cytoskeletal 17           | Intermediate filament cytoskeleton       | -0.01                       | 0.99  | 0.98 | 0.24                    | 1.18        | 0.57         | 0.76                         | 1.69        | 0.10          |
| Q8N1N4                   | KRT78     | Keratin, type II cytoskeletal 78          | Cytoskeleton                             | 0.24                        | 1.18  | 0.22 | -0.27                   | 0.83        | 0.18         | -0.17                        | 0.89        | 0.37          |
| P31944                   | CASP14    | Caspase-14                                | Protease                                 | 0.85                        | 1.80  | 0.09 | 0.52                    | 1.43        | 0.24         | -0.44                        | 0.74        | 0.30          |
| P01040                   | CSTA      | Cystatin-A                                | Protease inhibitor                       | -0.07                       | 0.95  | 0.85 | <b>0.66</b>             | <b>1.58</b> | <b>0.01*</b> | -0.25                        | 0.84        | 0.41          |
| P62979                   | RPS27A    | Ubiquitin-40S ribosomal protein S27a      | Structural component of ribosome         | -0.02                       | 0.99  | 0.95 | 0.44                    | 1.36        | 0.05         | -0.18                        | 0.88        | 0.52          |
| P25311                   | AZGP1     | Zinc-alpha-2-glycoprotein                 | Major histocompatibility complex protein | 0.46                        | 1.38  | 0.15 | <b>0.70</b>             | <b>1.62</b> | <b>0.03*</b> | -0.10                        | 0.93        | 0.75          |

ICS: Inhaled corticosteroids; ICS/LABA: Inhaled corticosteroids/long-acting beta agonists; Log<sub>2</sub>FC: Log<sub>2</sub> fold-change between groups. \*Denotes p-value <0.05 from paired samples t-test

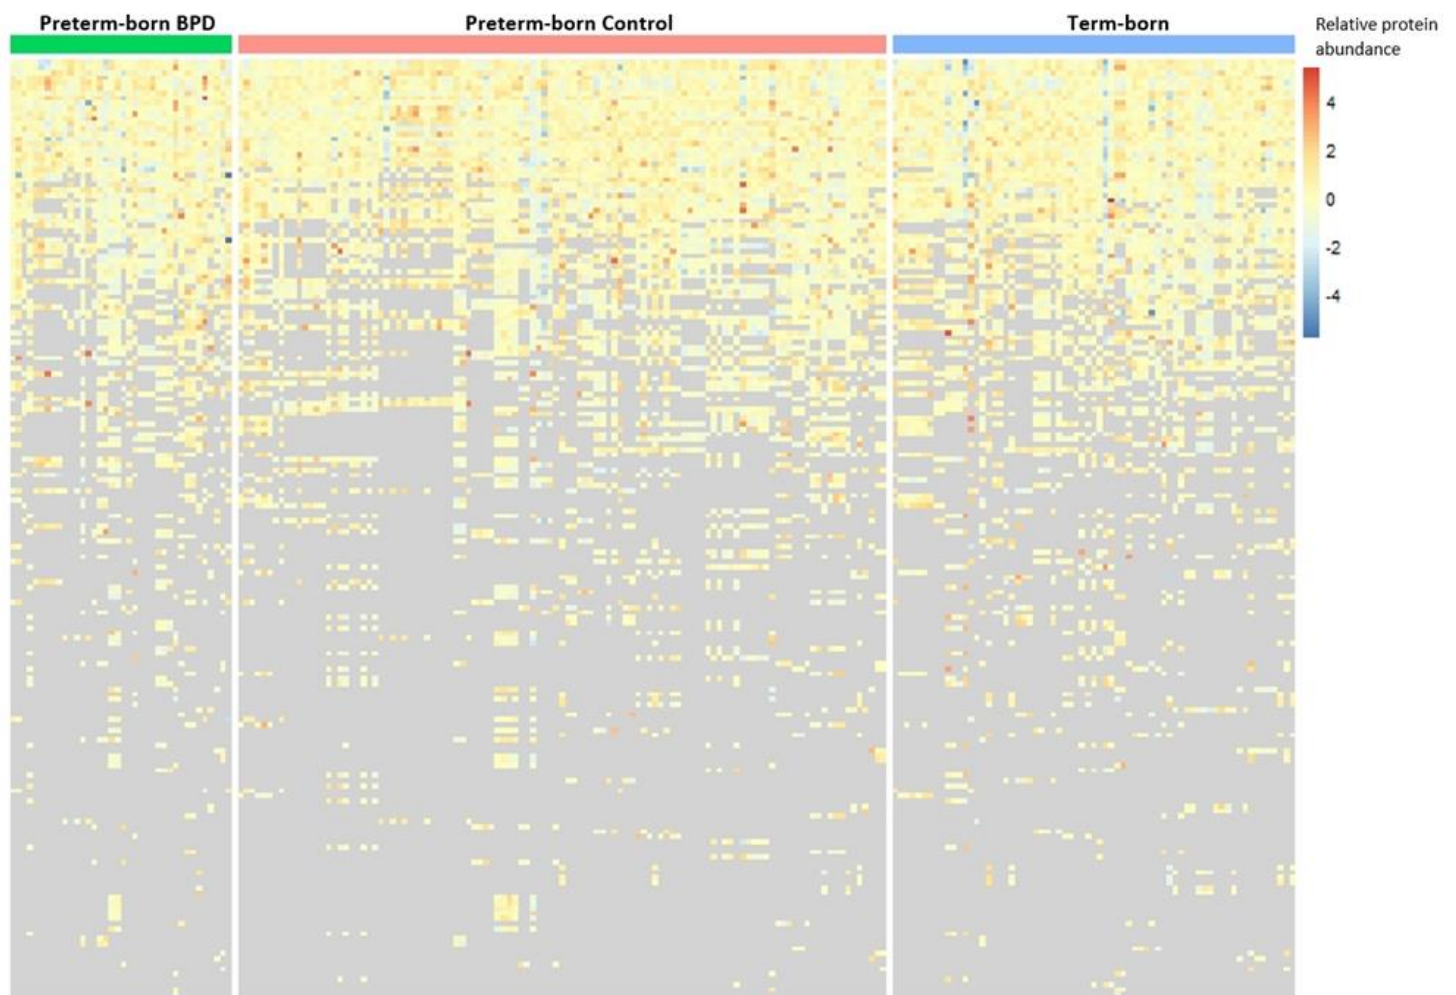

Supplementary Figure 1: Heatmap displaying Protein Content of Baseline EBC Samples. Individual samples represented in columns. Coloured areas represent relative protein abundance. Grey areas represent proteins not detected within that sample.

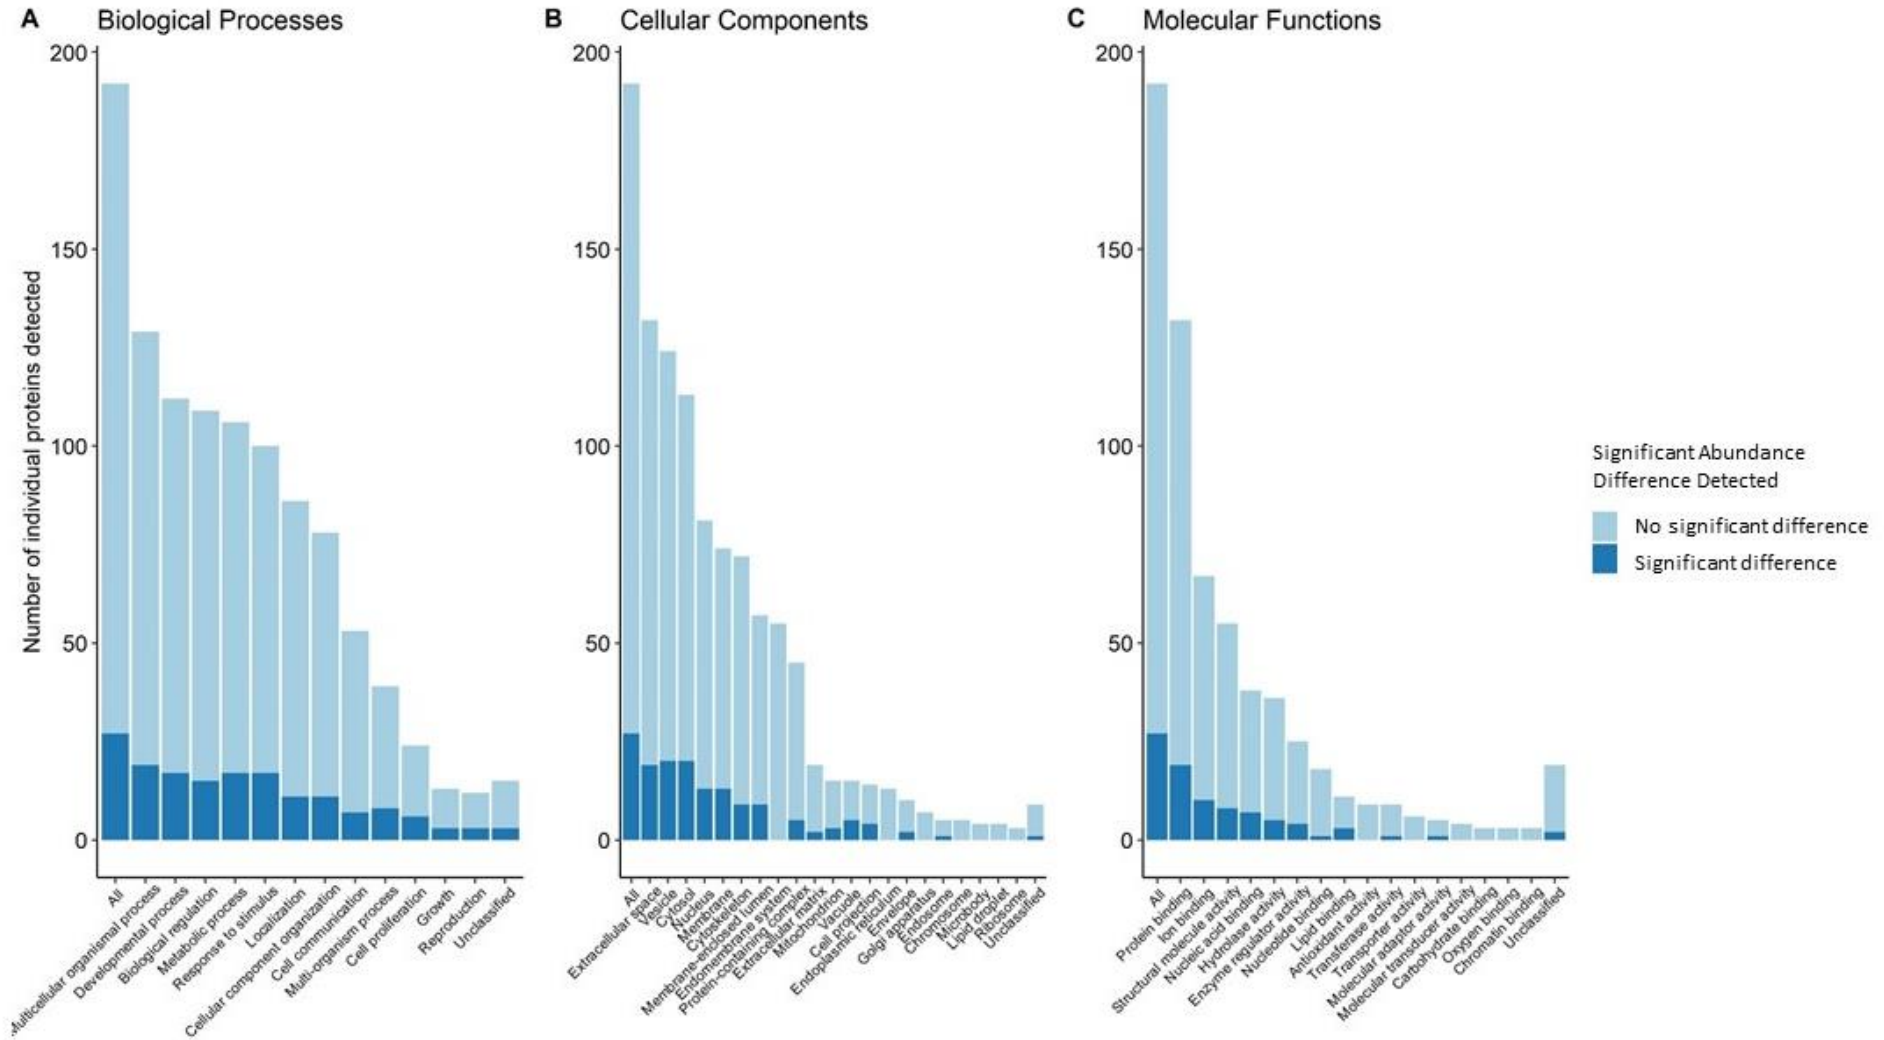

Supplementary Figure 2: Functional enrichment analysis of proteins with and without significant abundance difference between clinical groups.

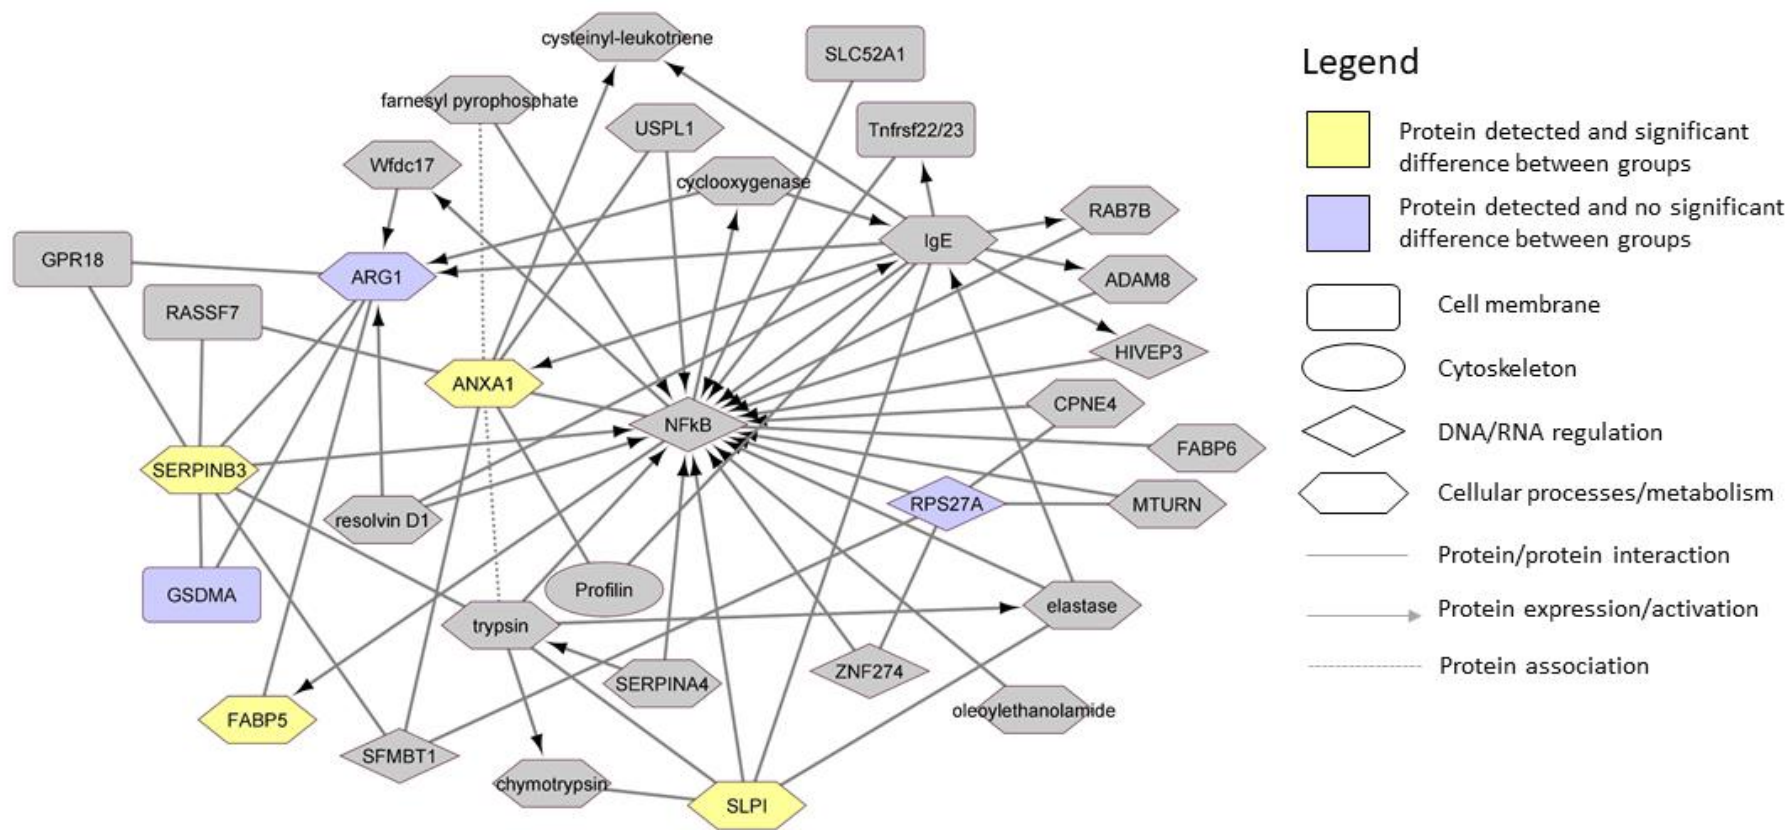

Supplementary Figure 3: Protein network map of significant protein differences between PT<sub>low</sub> and PT<sub>c</sub> groups.

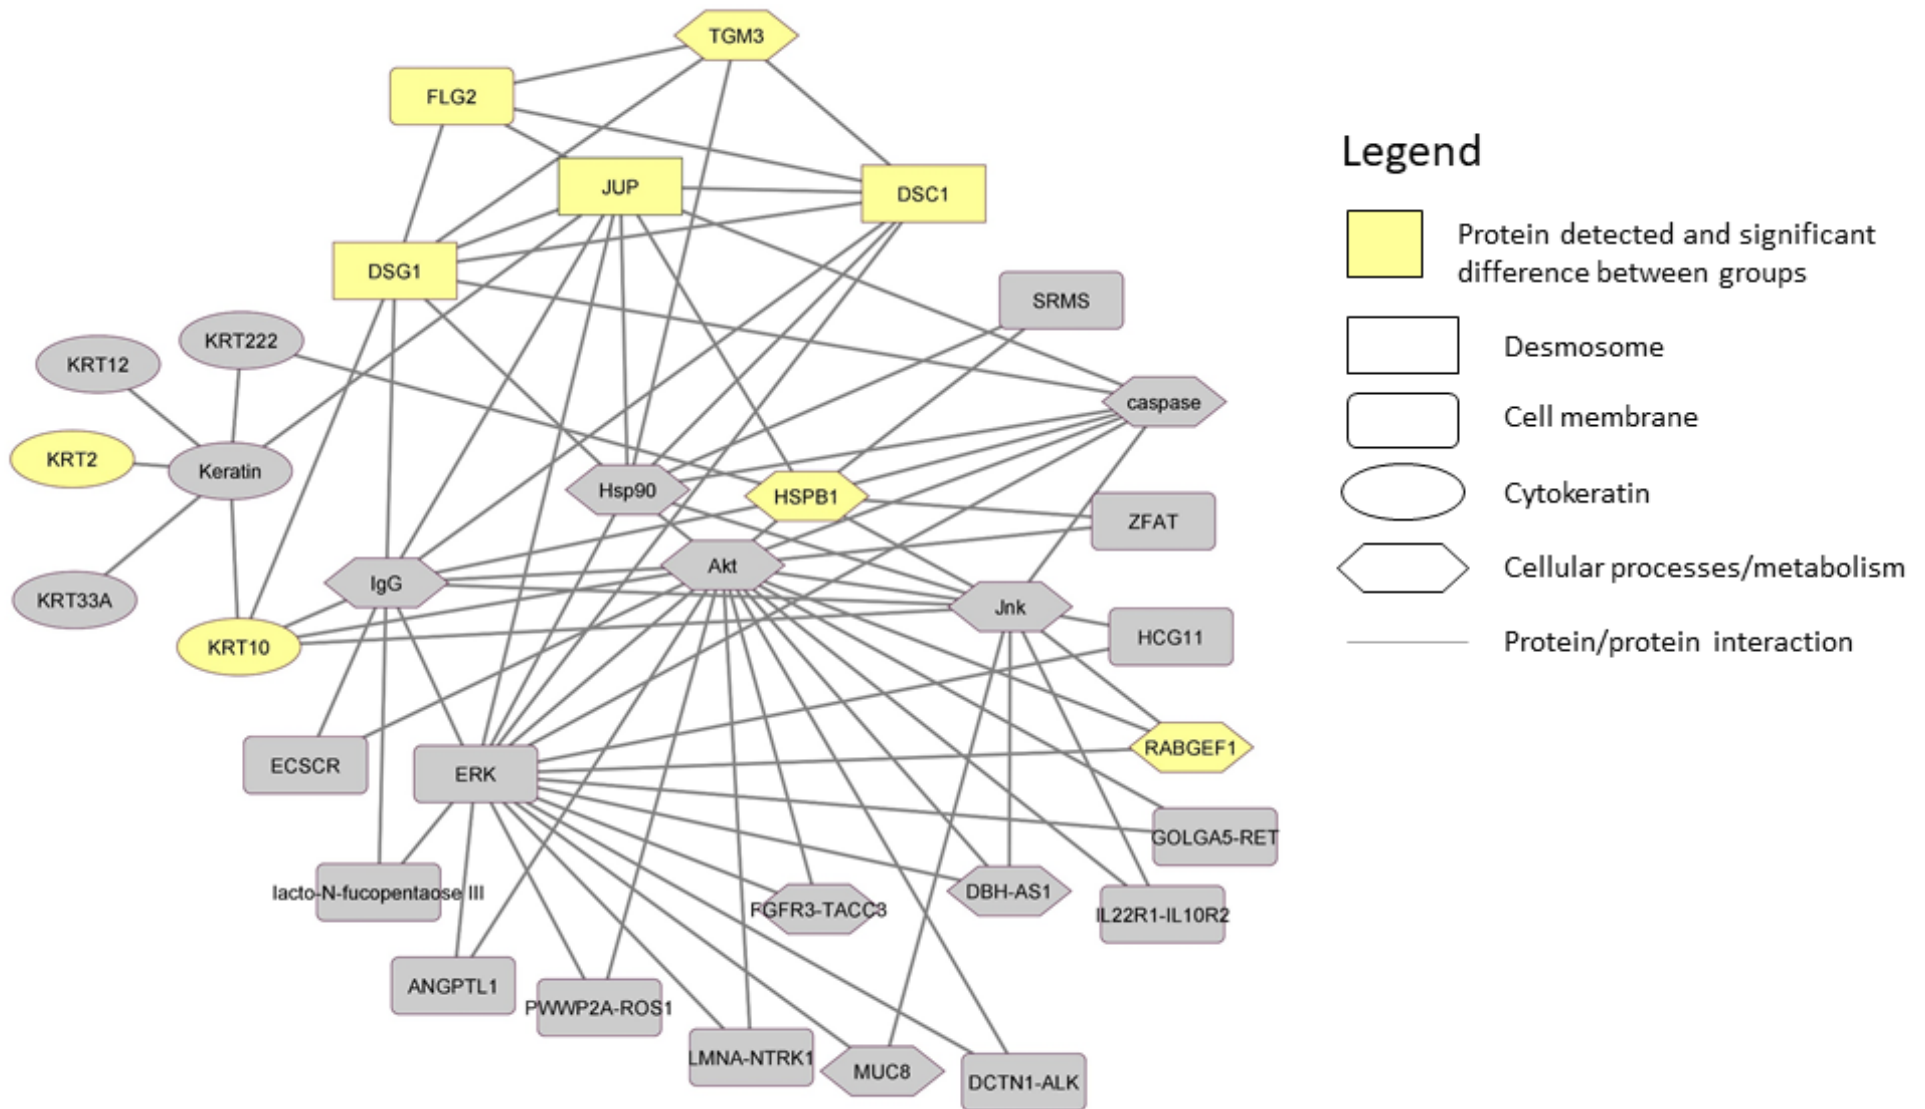

Supplementary Figure 4: Protein network map of significant protein differences before and after ICS/LABA treatment.



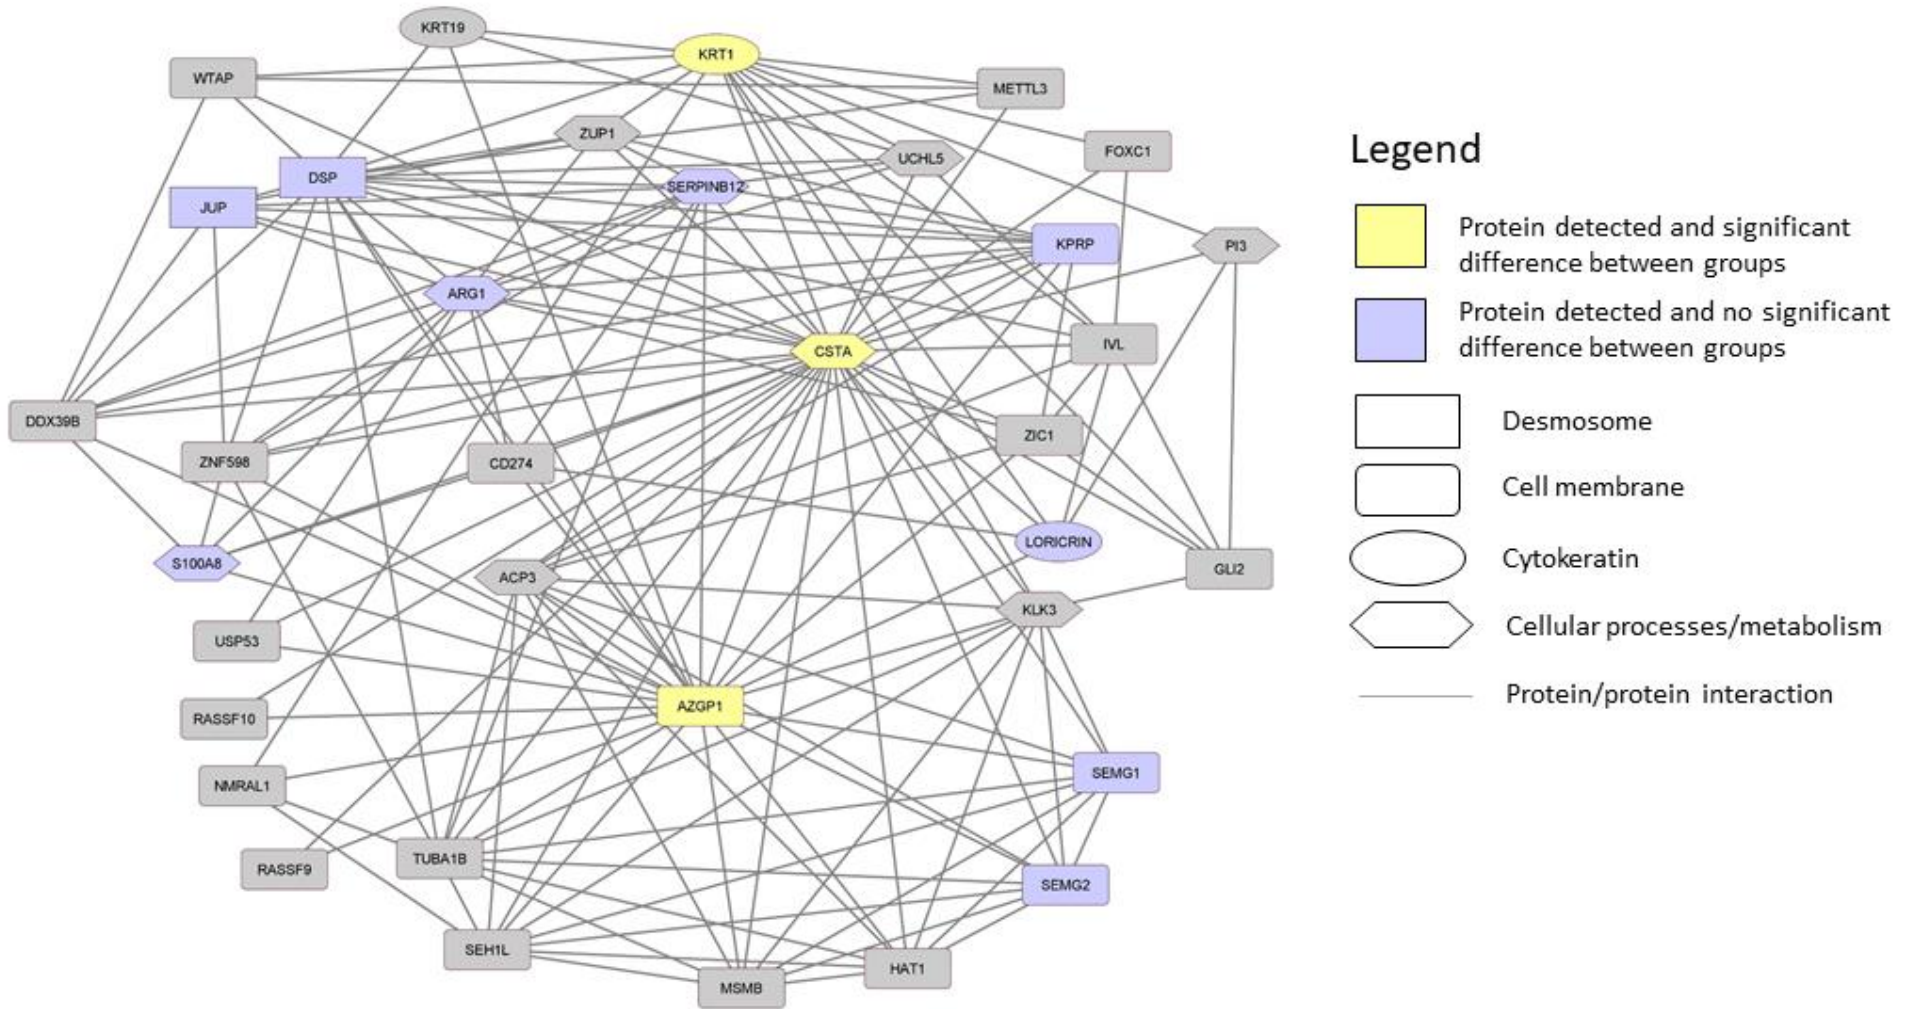

Supplementary Figure 5: Protein network map of significant protein differences before and after ICS treatment.
